# Supplementary material for: Steroid-Associated Side Effects in Patients With Primary Proteinuric Kidney Disease
Source: PubMed Central journal article supplement — Kidney Int Rep. 2019 Sep 9;4(11):1608–16. doi: 10.1016/j.ekir.2019.08.019 (PMC6933464; doi:10.1016/j.ekir.2019.08.019), 2019-09-09
Supplement: mmc1.pdf [file mmc1.pdf]

**Supplemental Table S1. Computable phenotypes for each event using diagnosis codes, medications, labs, and vitals in electronic health records**

|               |                           |                                                                                                                                                                                                                                                                                                                                                                                                                                                                                                                                                                                                                                                                                                                                                                                                                                                                                                                                                                                                                                                                                                                                                                                                           |
|---------------|---------------------------|-----------------------------------------------------------------------------------------------------------------------------------------------------------------------------------------------------------------------------------------------------------------------------------------------------------------------------------------------------------------------------------------------------------------------------------------------------------------------------------------------------------------------------------------------------------------------------------------------------------------------------------------------------------------------------------------------------------------------------------------------------------------------------------------------------------------------------------------------------------------------------------------------------------------------------------------------------------------------------------------------------------------------------------------------------------------------------------------------------------------------------------------------------------------------------------------------------------|
| Hypertension  | Criteria                  | - ≥2 elevated BP readings<br>OR<br>- Anti-hypertensive agents excluding ACEi and ARB<br>OR<br>- ICD-9/ICD-10 diagnosis codes<br>EXCLUDE: "White-Coat" hypertension                                                                                                                                                                                                                                                                                                                                                                                                                                                                                                                                                                                                                                                                                                                                                                                                                                                                                                                                                                                                                                        |
|               | Elevated Blood Pressure   | Age 0-18: ≥95 <sup>th</sup> percentile for age, sex, and height<br>Age 18-65: ≥140/90<br>Age 65+: ≥150/90                                                                                                                                                                                                                                                                                                                                                                                                                                                                                                                                                                                                                                                                                                                                                                                                                                                                                                                                                                                                                                                                                                 |
|               | Anti-hypertensive agents  | Alpha Blockers: Cardura, Carvedilol, Coreg, Doxazosin, Hytrin, Labetalol, Mecamylamine, Minipress, Prazosin, Reserpine, Terazosin, Vecamyl<br>Beta Blockers: Acebutolol, Albuterol Sulfate, Atenolol, Betaxolol, Bisoprolol, Bisoprolol Fumarate, Blocadren, Brevibloc, Bystolic, Carvedilol, Coreg, Coreg Cr, Corgard, Esmolol, Inderal, Inderal La, Innopran XI, Kerlone, Labetalol, Lopressor, Metoprolol, Metoprolol Succinate, Metoprolol Succinate Er, Metoprolol Tartrate, Nadolol, Nebivolol, Normodyne, Pindolol, Propranolol, Sectral, Sotalol, Tenormin, Terbutaline, Timolol, Toprol, Toprol-Xl, Trandate, Visken<br>Calcium Channel Blockers: Adalat Cc, Afeditab Cr, Amlodipine, Caduet, Calan, Calan Sr, Cardizem Cd, Cardizem La, Cartia Xt, Covera-Hs, Dilacor Xr, Diltia Xt, Diltiazem, Dilt-Xr, Diltzac, Felodipine, Isoptin Sr, Isradipine, Matzim La, Nifediac Cc, Nifedical XI, Nifedipine, Norvasc, Plendil, Procardia XI, Taztia Xt, Tiadylt Er, Tiazac, Verapamil, Verelan, Verelan Pm<br>Central Agonists: Catapres, Catapres-Tts, Clonidine, Guanabenz, Guanfacine, Methyldopa, Nexiclon Xr, Tenex<br>Vasodilators: Apresoline, Hydralizine, Isosorbide Mononitrate, Minoxidil |
|               | Diagnosis codes           | ICD-9: 401.0, 401.1, 401.9, 402.00, 402.01, 402.10, 402.11, 402.90, 402.91, 403.00, 403.10, 403.90, 404.00, 404.01, 404.10, 404.11, 404.90, 404.91, 405.01, 405.09, 405.11, 405.19, 405.91, 405.99, 437.2, 796.2<br>ICD-10: I15.9, I10, I11.0, I11.9, I12, I12.9, I13, I13.0, I13.1, I13.10, I15, I15.0, I15.1, I15.2, I15.8, I67.4                                                                                                                                                                                                                                                                                                                                                                                                                                                                                                                                                                                                                                                                                                                                                                                                                                                                       |
|               | "White-coat" hypertension | ICD-9: 796.2<br>ICD-10: R03.0                                                                                                                                                                                                                                                                                                                                                                                                                                                                                                                                                                                                                                                                                                                                                                                                                                                                                                                                                                                                                                                                                                                                                                             |
| Hyperglycemia | Criteria                  | - ≥2 elevated glucose measurements <sup>6,7</sup><br>OR<br>- ICD-9/ICD-10 diagnosis codes<br>EXCLUDE: Sensor at date of diabetes onset (see diabetes criteria)                                                                                                                                                                                                                                                                                                                                                                                                                                                                                                                                                                                                                                                                                                                                                                                                                                                                                                                                                                                                                                            |
|               | Glucose                   | Fasting: Plasma: 100-125 mg/dL<br>Serum: Age <1 year: >120 mg/dL<br>Age 1-4 years: >130 mg/dL<br>Age 5-11 years: >135 mg/dL<br>Age 12+ years: >100 mg/dL<br>Blood: 90-130 mg/dL<br>Non-Fasting: Plasma: 180-200 mg/dL<br>Serum: 140-200 mg/dL<br>Blood: 160-180 mg/dL                                                                                                                                                                                                                                                                                                                                                                                                                                                                                                                                                                                                                                                                                                                                                                                                                                                                                                                                     |
|               | Diagnosis codes           | ICD-9: 790.29<br>ICD-10: R73.03, R73.09, R73.9                                                                                                                                                                                                                                                                                                                                                                                                                                                                                                                                                                                                                                                                                                                                                                                                                                                                                                                                                                                                                                                                                                                                                            |

|                 |                                                                                                                                                                                                                                                                                                                                                                                                                                                                                                                                                                                                                                                                                                                                                                                                                                                                                                                                                                                                                                                                                                        |                                                                                                                                                                                                                                                                                                                                                                                                                                                                                                                                                                                                                                                                                                                                                                                                                                                                                                                                                                                                                                                                                                                                                                                                                                                                                                                                                                                                                                                                                                                                                                                                                                                                                                                                                                                                                                                                                                                                                                                                                                                                                                                                                                                                                                                                                                                                                                                                                                                                                                                                                                                                                                                                                                                                                                                                                                                                                                                                                                 |
|-----------------|--------------------------------------------------------------------------------------------------------------------------------------------------------------------------------------------------------------------------------------------------------------------------------------------------------------------------------------------------------------------------------------------------------------------------------------------------------------------------------------------------------------------------------------------------------------------------------------------------------------------------------------------------------------------------------------------------------------------------------------------------------------------------------------------------------------------------------------------------------------------------------------------------------------------------------------------------------------------------------------------------------------------------------------------------------------------------------------------------------|-----------------------------------------------------------------------------------------------------------------------------------------------------------------------------------------------------------------------------------------------------------------------------------------------------------------------------------------------------------------------------------------------------------------------------------------------------------------------------------------------------------------------------------------------------------------------------------------------------------------------------------------------------------------------------------------------------------------------------------------------------------------------------------------------------------------------------------------------------------------------------------------------------------------------------------------------------------------------------------------------------------------------------------------------------------------------------------------------------------------------------------------------------------------------------------------------------------------------------------------------------------------------------------------------------------------------------------------------------------------------------------------------------------------------------------------------------------------------------------------------------------------------------------------------------------------------------------------------------------------------------------------------------------------------------------------------------------------------------------------------------------------------------------------------------------------------------------------------------------------------------------------------------------------------------------------------------------------------------------------------------------------------------------------------------------------------------------------------------------------------------------------------------------------------------------------------------------------------------------------------------------------------------------------------------------------------------------------------------------------------------------------------------------------------------------------------------------------------------------------------------------------------------------------------------------------------------------------------------------------------------------------------------------------------------------------------------------------------------------------------------------------------------------------------------------------------------------------------------------------------------------------------------------------------------------------------------------------|
| Diabetes        | Criteria                                                                                                                                                                                                                                                                                                                                                                                                                                                                                                                                                                                                                                                                                                                                                                                                                                                                                                                                                                                                                                                                                               | - Elevated glucose levels <sup>6,7</sup><br>OR<br>- Elevated hemoglobin A1C levels <sup>8</sup><br>OR<br>- Hypoglycemic agents<br>OR<br>- ICD-9/ICD-10 diagnosis codes                                                                                                                                                                                                                                                                                                                                                                                                                                                                                                                                                                                                                                                                                                                                                                                                                                                                                                                                                                                                                                                                                                                                                                                                                                                                                                                                                                                                                                                                                                                                                                                                                                                                                                                                                                                                                                                                                                                                                                                                                                                                                                                                                                                                                                                                                                                                                                                                                                                                                                                                                                                                                                                                                                                                                                                          |
|                 | Glucose                                                                                                                                                                                                                                                                                                                                                                                                                                                                                                                                                                                                                                                                                                                                                                                                                                                                                                                                                                                                                                                                                                | Fasting: Plasma: >125 mg/dL<br>Blood: >130 mg/dL<br>Non-Fasting: Plasma: >200 mg/dL<br>Serum: >200 mg/dL<br>Blood: >180 mg/dL                                                                                                                                                                                                                                                                                                                                                                                                                                                                                                                                                                                                                                                                                                                                                                                                                                                                                                                                                                                                                                                                                                                                                                                                                                                                                                                                                                                                                                                                                                                                                                                                                                                                                                                                                                                                                                                                                                                                                                                                                                                                                                                                                                                                                                                                                                                                                                                                                                                                                                                                                                                                                                                                                                                                                                                                                                   |
|                 | Hemoglobin A1C                                                                                                                                                                                                                                                                                                                                                                                                                                                                                                                                                                                                                                                                                                                                                                                                                                                                                                                                                                                                                                                                                         | >6.4%                                                                                                                                                                                                                                                                                                                                                                                                                                                                                                                                                                                                                                                                                                                                                                                                                                                                                                                                                                                                                                                                                                                                                                                                                                                                                                                                                                                                                                                                                                                                                                                                                                                                                                                                                                                                                                                                                                                                                                                                                                                                                                                                                                                                                                                                                                                                                                                                                                                                                                                                                                                                                                                                                                                                                                                                                                                                                                                                                           |
|                 | Hypoglycemic Agents                                                                                                                                                                                                                                                                                                                                                                                                                                                                                                                                                                                                                                                                                                                                                                                                                                                                                                                                                                                                                                                                                    | Acarbose, Actoplus Met, Actoplus Met Xr, Actos, Adlyxin, Admelog, Afrezza, Albiglutide, Alogliptin, Alogliptin and Metformin, Alogliptin and Pioglitazone, Amaryl, Apidra, Avandamet, Avandaryl, Avandia, Basaglar, Bromocriptine, Bydureon, Bydureon Bcise, Byetta, Canagliflozin, Canagliflozin and Metformin, Chlorpropamide, Chromium Picolinate, Colesevelam, Cr-Gtf, Crm, Cycloset, Dapagliflozin, Dapagliflozin and Metformin, Dapagliflozin and Saxagliptin, Diabeta, Diabinese, Diazoxide, Duetact, Dulaglutide, Empagliflozin, Empagliflozin and Linagliptin, Empagliflozin and Metformin, Ertugliflozin, Ertugliflozin and Metformin, Ertugliflozin and Sitagliptin, Exenatide, Farxiga, Fiasp, Fortamet, Glimepiride, Glimepiride and Pioglitazone, Glimepiride and Rosiglitazone, Glipizide and Metformin, Glipizide XI, Glipizide, Glucagen, Glucagon, Glucophage, Glucophage Xr, Glucotrol, Glucotrol XL, Glucovance, Glumetza, Glyburide, Glyburide and Metformin, Glyceron, Glynase, Glynase Prestab, Glyset, Glyxambi, Humalog, Humalog Kwipen, Humalog Mix 50/50, Humalog Mix 50/50 Kwipen, Humalog Mix 75/25, Humalog Mix 75/25 Kwipen, Humulin 50/50, Humulin 70/30, Humulin 70/30 Kwipen, Humulin 70/30 Pen, Humulin N, Humulin N Pen, Humulin R, Humulin R U-500 (Concentrated), Humulin R U-500 Kwipen, Hyperstat, Insulin Aspart, Insulin Aspart and Insulin Aspart Protamine, Insulin Aspart and Insulin Degludec, Insulin Degludec, Insulin Degludec and Liraglutide, Insulin Degludec, Insulin Detemir, Insulin Glargine, Insulin Glargine and Lixisenatide, Insulin Glargine and Lixisenatide, Insulin Inhalation (Rapid Acting), Insulin Isophane, Insulin Isophane and Insulin Regular, Insulin Lispro, Insulin Lispro and Insulin Lispro Protamine, Insulin Regular, Invokamet, Invokamet Xr, Invokana, Janumet, Janumet Xr, Januvia, Jardiance, Jentadueto, Jentadueto Xr, Kazano, Kombiglyze Xr, Lantus, Lantus Solostar, Levemir, Linagliptin, Linagliptin and Metformin, Liraglutide, Lixisenatide, Metaglip, Metformin, Metformin and Pioglitazone, Metformin and Repaglinide, Metformin and Rosiglitazone, Metformin and Saxagliptin, Metformin and Saxagliptin Systemic, Metformin and Sitagliptin, Miglitol, Miglitol, Nateglinide, Nesina, Novolin 70/30, Novolin N, Novolin R, Novolog, Novolog Flexpen, Novolog Mix 70/30, Novolog Mix 70/30 Flexpen, Novolog Penfill, Octreotide, Onglyza, Oseni, Ozempic, Pioglitazone, Pramlintide, Prandimet, Prandin, Precose, Proglycem, Qtern, Relion and Humulin R, Relion Novolin N, Relion/Novolin 70/30, Repaglinide, Riomet, Rosiglitazone, Ryzodeg 70/30, Sandostatin, Sandostatin Lar Depot, Saxagliptin, Segluromet, Semaglutide, Sitagliptin, Soliqua, Starlix, Steglujan, Steglujan, Symlin, Symlin Pen, Symlinpen 120, Symlinpen 60, Synjardy, Synjardy Xr, Tanzeum, Toujeo, Toujeo Solostar, Tradjenta, Tresiba, Trulicity, Victoza, Welchol, Xigduo Xr, Xultophy |
| Diagnosis codes | ICD-9: 249.00, 249.01, 249.10, 249.11, 249.20, 249.21, 249.30, 249.31, 249.40, 249.41, 249.50, 249.51, 249.60, 249.61, 249.70, 249.71, 249.80, 249.81, 249.90, 249.91, 250.00, 250.01, 250.02, 250.03, 250.10, 250.11, 250.12, 250.13, 790.2, 790.29<br>ICD-10: E08.01, E08.10, E08.11, E08.21, E08.311, E08.319, E08.36, E08.37x1, E08.37x2, E08.37x3, E08.37x9, E08.39, E08.40, E08.41, E08.42, E08.43, E08.44, E08.49, E08.51, E08.610, E08.618, E08.620, E08.621, E08.622, E08.628, E08.630, E08.638, E08.641, E08.65, E08.69, E08.8, E08.9, E09.01, E09.10, E09.11, E09.21, E09.311, E09.319, E09.36, E09.37x1, E09.37x2, E09.37x3, E09.37x9, E09.39, E09.40, E09.41, E09.42, E09.43, E09.44, E09.49, E09.51, E09.610, E09.618, E09.620, E09.621, E09.622, E09.628, E09.630, E09.638, E09.641, E09.649, E09.65, E09.69, E09.8, E09.9, E10.10, E10.65, E10.9, E11.10, E11.65, E11.69, E11.9, E13.00, E13.10, E13.11, E13.39, E13.40, E13.41, E13.42, E13.43, E13.44, E13.49, E13.59, E13.620, E13.621, E13.622, E13.628<br>E13.638, E13.641, E13.649, E13.65, E13.69, E13.8, E13.9, R73.03, R73.09 |                                                                                                                                                                                                                                                                                                                                                                                                                                                                                                                                                                                                                                                                                                                                                                                                                                                                                                                                                                                                                                                                                                                                                                                                                                                                                                                                                                                                                                                                                                                                                                                                                                                                                                                                                                                                                                                                                                                                                                                                                                                                                                                                                                                                                                                                                                                                                                                                                                                                                                                                                                                                                                                                                                                                                                                                                                                                                                                                                                 |
| Overweight      | Criteria                                                                                                                                                                                                                                                                                                                                                                                                                                                                                                                                                                                                                                                                                                                                                                                                                                                                                                                                                                                                                                                                                               | - Body mass index <sup>9</sup><br>OR<br>- ICD-9/ICD-10 diagnosis codes<br>EXCLUDE: Censor at date of obesity onset (see obesity criteria)                                                                                                                                                                                                                                                                                                                                                                                                                                                                                                                                                                                                                                                                                                                                                                                                                                                                                                                                                                                                                                                                                                                                                                                                                                                                                                                                                                                                                                                                                                                                                                                                                                                                                                                                                                                                                                                                                                                                                                                                                                                                                                                                                                                                                                                                                                                                                                                                                                                                                                                                                                                                                                                                                                                                                                                                                       |
|                 | Body mass index                                                                                                                                                                                                                                                                                                                                                                                                                                                                                                                                                                                                                                                                                                                                                                                                                                                                                                                                                                                                                                                                                        | Adults: 25-30 kg/m <sup>2</sup><br>Children: 85-95 <sup>th</sup> percentile for age and sex                                                                                                                                                                                                                                                                                                                                                                                                                                                                                                                                                                                                                                                                                                                                                                                                                                                                                                                                                                                                                                                                                                                                                                                                                                                                                                                                                                                                                                                                                                                                                                                                                                                                                                                                                                                                                                                                                                                                                                                                                                                                                                                                                                                                                                                                                                                                                                                                                                                                                                                                                                                                                                                                                                                                                                                                                                                                     |
|                 | Diagnosis codes                                                                                                                                                                                                                                                                                                                                                                                                                                                                                                                                                                                                                                                                                                                                                                                                                                                                                                                                                                                                                                                                                        | ICD-9: 278.02, V85.21, V85.22, V85.23, V85.24, V85.25, V85.53<br>ICD-10: E66.3, Z68.25, Z68.26, Z68.27, Z68.28, Z68.29, Z68.53                                                                                                                                                                                                                                                                                                                                                                                                                                                                                                                                                                                                                                                                                                                                                                                                                                                                                                                                                                                                                                                                                                                                                                                                                                                                                                                                                                                                                                                                                                                                                                                                                                                                                                                                                                                                                                                                                                                                                                                                                                                                                                                                                                                                                                                                                                                                                                                                                                                                                                                                                                                                                                                                                                                                                                                                                                  |
| Obesity         | Criteria                                                                                                                                                                                                                                                                                                                                                                                                                                                                                                                                                                                                                                                                                                                                                                                                                                                                                                                                                                                                                                                                                               | - Body mass index <sup>9</sup><br>OR<br>- ICD-9/ICD-10 diagnosis codes                                                                                                                                                                                                                                                                                                                                                                                                                                                                                                                                                                                                                                                                                                                                                                                                                                                                                                                                                                                                                                                                                                                                                                                                                                                                                                                                                                                                                                                                                                                                                                                                                                                                                                                                                                                                                                                                                                                                                                                                                                                                                                                                                                                                                                                                                                                                                                                                                                                                                                                                                                                                                                                                                                                                                                                                                                                                                          |
|                 | Body mass index                                                                                                                                                                                                                                                                                                                                                                                                                                                                                                                                                                                                                                                                                                                                                                                                                                                                                                                                                                                                                                                                                        | Adults: ≥30 kg/m <sup>2</sup><br>Children: ≥95 <sup>th</sup> percentile for age and sex                                                                                                                                                                                                                                                                                                                                                                                                                                                                                                                                                                                                                                                                                                                                                                                                                                                                                                                                                                                                                                                                                                                                                                                                                                                                                                                                                                                                                                                                                                                                                                                                                                                                                                                                                                                                                                                                                                                                                                                                                                                                                                                                                                                                                                                                                                                                                                                                                                                                                                                                                                                                                                                                                                                                                                                                                                                                         |
|                 | Diagnosis codes                                                                                                                                                                                                                                                                                                                                                                                                                                                                                                                                                                                                                                                                                                                                                                                                                                                                                                                                                                                                                                                                                        | ICD-9: 278.0, 278.00, 278.01, 278.03<br>ICD-10: E66.0, E66.01, E66.09, E66.1, E66.2, E66.8, E66.9                                                                                                                                                                                                                                                                                                                                                                                                                                                                                                                                                                                                                                                                                                                                                                                                                                                                                                                                                                                                                                                                                                                                                                                                                                                                                                                                                                                                                                                                                                                                                                                                                                                                                                                                                                                                                                                                                                                                                                                                                                                                                                                                                                                                                                                                                                                                                                                                                                                                                                                                                                                                                                                                                                                                                                                                                                                               |
| Short Stature   | Criteria                                                                                                                                                                                                                                                                                                                                                                                                                                                                                                                                                                                                                                                                                                                                                                                                                                                                                                                                                                                                                                                                                               | - Height percentile <sup>10</sup><br>OR<br>- Growth hormone agents<br>OR<br>- ICD-9/ICD-10 diagnosis codes<br>EXCLUDE: adult-onset kidney disease                                                                                                                                                                                                                                                                                                                                                                                                                                                                                                                                                                                                                                                                                                                                                                                                                                                                                                                                                                                                                                                                                                                                                                                                                                                                                                                                                                                                                                                                                                                                                                                                                                                                                                                                                                                                                                                                                                                                                                                                                                                                                                                                                                                                                                                                                                                                                                                                                                                                                                                                                                                                                                                                                                                                                                                                               |
|                 | Height                                                                                                                                                                                                                                                                                                                                                                                                                                                                                                                                                                                                                                                                                                                                                                                                                                                                                                                                                                                                                                                                                                 | <3 <sup>rd</sup> percentile for age and sex                                                                                                                                                                                                                                                                                                                                                                                                                                                                                                                                                                                                                                                                                                                                                                                                                                                                                                                                                                                                                                                                                                                                                                                                                                                                                                                                                                                                                                                                                                                                                                                                                                                                                                                                                                                                                                                                                                                                                                                                                                                                                                                                                                                                                                                                                                                                                                                                                                                                                                                                                                                                                                                                                                                                                                                                                                                                                                                     |

|                           |                       |                                                                                                                                                                                                                                                                                                                                                                                                                                                                                                                                                                                                                                                                                                                                                                                                                                                                                                                                                                                                                                                                                                                                                                                                                                                        |
|---------------------------|-----------------------|--------------------------------------------------------------------------------------------------------------------------------------------------------------------------------------------------------------------------------------------------------------------------------------------------------------------------------------------------------------------------------------------------------------------------------------------------------------------------------------------------------------------------------------------------------------------------------------------------------------------------------------------------------------------------------------------------------------------------------------------------------------------------------------------------------------------------------------------------------------------------------------------------------------------------------------------------------------------------------------------------------------------------------------------------------------------------------------------------------------------------------------------------------------------------------------------------------------------------------------------------------|
|                           | Growth hormone agents | Egrifta, Genotropin, Geref, Humatrope, Macimorelin, Macrilen, Norditropin, Nutropin, Omnitrope, Saizen, Sermorelin, Serostim, Somatropin, Tesamorelin, Zomacton, Zorbtive                                                                                                                                                                                                                                                                                                                                                                                                                                                                                                                                                                                                                                                                                                                                                                                                                                                                                                                                                                                                                                                                              |
|                           | Diagnosis codes       | ICD-9: 783.40, 783.41, 783.43, 783.7<br>ICD-10: R62.5, R62.50, R62.51, R62.52, R62.59, R62.7                                                                                                                                                                                                                                                                                                                                                                                                                                                                                                                                                                                                                                                                                                                                                                                                                                                                                                                                                                                                                                                                                                                                                           |
| Cataracts                 | Criteria              | - ICD-9/ICD-10 diagnosis codes                                                                                                                                                                                                                                                                                                                                                                                                                                                                                                                                                                                                                                                                                                                                                                                                                                                                                                                                                                                                                                                                                                                                                                                                                         |
|                           | Diagnosis codes       | ICD-9: 366.0, 366.02, 366.45, 366.8, 366.9<br>ICD-10: H26.059, H26.069, H26.30, H26.31, H26.32, H26.33, H26.8, H26.9                                                                                                                                                                                                                                                                                                                                                                                                                                                                                                                                                                                                                                                                                                                                                                                                                                                                                                                                                                                                                                                                                                                                   |
| Glaucoma                  | Criteria              | - ICD-9/ICD-10 diagnosis codes                                                                                                                                                                                                                                                                                                                                                                                                                                                                                                                                                                                                                                                                                                                                                                                                                                                                                                                                                                                                                                                                                                                                                                                                                         |
|                           | Diagnosis codes       | ICD-9: 365.0, 365.04, 365.3, 365.31, 365.32, 365.70, 365.71, 365.73, 365.74<br>ICD-10: H40.059, H40.60, H40.60x0, H40.60x1, H40.60x2, H40.60x3, H40.60x4, H40.61, H40.61x0, H40.61x1, H40.61x2, H40.61x3, H40.62, H40.62x0, H40.62x1, H40.62x2                                                                                                                                                                                                                                                                                                                                                                                                                                                                                                                                                                                                                                                                                                                                                                                                                                                                                                                                                                                                         |
| Osteoporosis              | Criteria              | - ICD-9/ICD-10 diagnosis codes                                                                                                                                                                                                                                                                                                                                                                                                                                                                                                                                                                                                                                                                                                                                                                                                                                                                                                                                                                                                                                                                                                                                                                                                                         |
|                           | Diagnosis codes       | ICD-9: 733.0, 733.00, 733.01, 733.02, 733.09, 733.10, 733.11, 733.12, 733.14, 733.15, 733.16, 733.19<br>ICD-10: M80, M80.0, M80.00, M80.00xA, M80.01, M80.011, M80.011A, M80.012, M80.012A, M80.019, M80.02, M80.021, M80.021A, M80.022, M80.022A, M80.029, M80.03, M80.031, M80.031A, M80.032, M80.032A, M80.039, M80.039A, M80.04, M80.041, M80.041A, M80.042, M80.042A, M80.049, M80.05, M80.051, M80.051A, M80.052, M80.052A, M80.059, M80.06, M80.061, M80.061A, M80.062, M80.062A, M80.069, M80.07, M80.071, M80.071A, M80.072, M80.072A, M80.079, M80.08, M80.08xA, M80.8, M80.80, M80.80xA, M80.80xD, M80.80xG, M80.80xP, M80.811, M80.811A, M80.811D, M80.811G, M80.812, M80.812A, M80.812D, M80.812G, M80.819, M80.819A, M80.819D, M80.819G, M80.819K, M80.819P, M80.82, M80.821, M80.821A, M80.821D, M80.821G, M80.822, M80.822A, M80.822D, M80.822G, M80.829, M80.829A, M80.83, M80.831, M80.831A, M80.832, M80.832A, M80.839, M80.839A, M80.841, M80.841A, M80.842, M80.842A, M80.849, M80.849A, M80.85, M80.851, M80.851A, M80.852, M80.852A, M80.859, M80.859A, M80.86, M80.861, M80.861A, M80.862, M80.862A, M80.869, M80.87, M80.871, M80.871A, M80.872, M80.872A, M80.879, M80.88, M80.88xA, M81.0, M81.8                            |
| Osteonecrosis             | Criteria              | - ICD-9/ICD-10 diagnosis codes                                                                                                                                                                                                                                                                                                                                                                                                                                                                                                                                                                                                                                                                                                                                                                                                                                                                                                                                                                                                                                                                                                                                                                                                                         |
|                           | Diagnosis codes       | ICD-9: 731.8, 733.40, 733.41, 733.42, 733.43, 733.44, 733.45, 733.49<br>ICD-10: M87, M87.00, M87.029, M87.059, M87.076, M87.08, M87.1, M87.10, M87.11, M87.111, M87.112, M87.119, M87.12, M87.121, M87.122, M87.129, M87.13, M87.131, M87.132, M87.133, M87.134, M87.135, M87.136, M87.137, M87.138, M87.139, M87.14, M87.141, M87.142, M87.143, M87.144, M87.145, M87.146, M87.15, M87.150, M87.151, M87.152, M87.159, M87.16, M87.161, M87.162, M87.163, M87.164, M87.165, M87.166, M87.17, M87.171, M87.172, M87.173, M87.174, M87.175, M87.176, M87.177, M87.178, M87.179, M87.18, M87.180, M87.188, M87.19, M87.80, M87.81, M87.811, M87.812, M87.819, M87.82, M87.821, M87.822, M87.829, M87.83, M87.831, M87.832, M87.833, M87.834, M87.835, M87.836, M87.837, M87.838, M87.839, M87.84, M87.841, M87.842, M87.843, M87.844, M87.845, M87.849, M87.85, M87.850, M87.851, M87.852, M87.859, M87.86, M87.861, M87.862, M87.863, M87.864, M87.865, M87.869, M87.87, M87.871, M87.872, M87.873, M87.874, M87.875, M87.876, M87.877, M87.878, M87.879, M87.88, M87.89, M87.9, M90.50, M90.511, M90.512, M90.519, M90.521, M90.522, M90.529, M90.531, M90.539, M90.549, M90.559, M90.561, M90.562, M90.569, M90.57, M90.571, M90.572, M90.579, M90.59 |
| Pneumonia                 | Criteria              | - ICD-9/ICD-10 diagnosis codes                                                                                                                                                                                                                                                                                                                                                                                                                                                                                                                                                                                                                                                                                                                                                                                                                                                                                                                                                                                                                                                                                                                                                                                                                         |
|                           | Diagnosis codes       | ICD-9: 052.1, 480.0, 480.1, 480.2, 480.8, 480.9, 482.0, 482.1, 482.2, 482.3, 482.30, 482.31, 482.32, 482.39, 482.4, 482.40, 482.41, 482.42, 482.49, 482.8, 482.81, 482.82, 482.83, 482.89, 482.9, 483, 483.0, 483.1, 483.8, 484.3, 484.7, 484.8, 485, 486, 487.0, 517.1<br>ICD-10: A37.91, B01.2, J11.00, J12.0, J12.1, J12.2, J12.89, J12.9, J12.9, J13, J14, J15.0, J15.1, J15.20, J15.211, J15.212, J15.29, J15.3, J15.4, J15.5, J15.6, J15.7, J15.8, J15.9, J16.0, J16.8, J17, J18.0, J18.1, J18.9                                                                                                                                                                                                                                                                                                                                                                                                                                                                                                                                                                                                                                                                                                                                                 |
| Septicemia and bacteremia | Criteria              | - ICD-9/ICD-10 diagnosis codes                                                                                                                                                                                                                                                                                                                                                                                                                                                                                                                                                                                                                                                                                                                                                                                                                                                                                                                                                                                                                                                                                                                                                                                                                         |
|                           | Diagnosis codes       | ICD-9: 036.2, 038.0, 038.1, 038.10, 038.11, 038.12, 038.19, 038.2, 038.3, 038.40, 038.41, 038.42, 038.43, 038.44, 038.49, 038.8, 038.9, 054.5, 117.9, 449, 771.81, 771.83, 785.52, 790.7, 995.91<br>ICD-10: A39.4, A40.3, A40.9, A41.01, A41.02, A41.1, A41.2, A41.3, A41.4, A41.50, A41.51, A41.52, A41.53, A41.59, A41.8, A41.89, A41.9, B00.7, B49, I76, P36.9, R65.21, R78.81                                                                                                                                                                                                                                                                                                                                                                                                                                                                                                                                                                                                                                                                                                                                                                                                                                                                      |
| Peritonitis               | Criteria              | - ICD-9/ICD-10 diagnosis codes                                                                                                                                                                                                                                                                                                                                                                                                                                                                                                                                                                                                                                                                                                                                                                                                                                                                                                                                                                                                                                                                                                                                                                                                                         |
|                           | Diagnosis codes       | ICD-9: 567.0, 567.1, 567.2, 567.21, 567.22, 567.23, 567.29, 567.8, 567.89, 567.9<br>ICD-10: K65, K65.0, K65.1, K65.2, K65.8, K65.9, K67                                                                                                                                                                                                                                                                                                                                                                                                                                                                                                                                                                                                                                                                                                                                                                                                                                                                                                                                                                                                                                                                                                                |
| Cellulitis                | Criteria              | - ICD-9/ICD-10 diagnosis codes                                                                                                                                                                                                                                                                                                                                                                                                                                                                                                                                                                                                                                                                                                                                                                                                                                                                                                                                                                                                                                                                                                                                                                                                                         |
|                           | Diagnosis codes       | ICD-9: 373.13, 376.01, 681.00, 681.10, 681.9, 682, 682.0, 682.1, 682.2, 682.3, 682.4, 682.5, 682.6, 682.7, 682.8, 682.9<br>ICD-10: H05.01, H05.011, H05.012, H05.013, H05.019, H60.1, J34.0, K12.2, L03, L03.0, L03.01, L03.011, L03.012, L03.019, L03.029, L03.03, L03.031, L03.032, L03.039, L03.049, L03.1, L03.11, L03.111, L03.112, L03.113, L03.114, L03.115, L03.116, L03.119, L03.129, L03.2, L03.21, L03.211, L03.22, L03.221, L03.3, L03.31, L03.311, L03.312, L03.313, L03.314, L03.317, L03.319, L03.329, L03.8, L03.81, L03.811, L03.818, L03.891, L03.898, L03.9, L03.90, L03.91                                                                                                                                                                                                                                                                                                                                                                                                                                                                                                                                                                                                                                                         |
| Psychosis                 | Criteria              | - ICD-9/ICD-10 diagnosis codes                                                                                                                                                                                                                                                                                                                                                                                                                                                                                                                                                                                                                                                                                                                                                                                                                                                                                                                                                                                                                                                                                                                                                                                                                         |
|                           | Diagnosis codes       | ICD-9: 292.1, 292.11, 292.12, 368.16, 780.1<br>ICD-10: F15.150, F15.250, F15.251, F15.951, F19.151, F19.251, F19.94, F19.950, F19.951, F19.99, R44, R44.0, R44.1, R44.2, R44.3                                                                                                                                                                                                                                                                                                                                                                                                                                                                                                                                                                                                                                                                                                                                                                                                                                                                                                                                                                                                                                                                         |

|           | Criteria        | - ICD-9/ICD-10 diagnosis codes                                                                                                                                                                                                                                                                                                                                                                                                                                                                                                                                                                                                                                                                                                                                                                                                                                                                                                                                                                                                                                                                                                                                                                                                                                                                                                                                                                                                                                                                                                                                                                                                                                                                                                                                                                                                                                                                                                                                                                                                                                                                                                                                                                                                                                                                                                                                                                                                                                                                                                                                                                                                                                                                                                                                                                                                                                                                                                                                                                                                                                                                                                                                                                                                                                                                                                                                                                                                                                                                                                                                                                                                                                                                                                                                                                                                                                                                                                                                                                                                                                                                                                                                                                                                                                                                                                                                                                                                                                                                                                                                                                                                                                                                                                                                                                                                                                                                                                                                                                                                                                                                                                                                                                                                                                                                                                                                                                                                                                                                                                                                                                                                                                                                                                                                                                                                                                                                                                                                                                                                                                                                                                                                                                                                                                                                                                                                                                                                                                                                                                                                                                                                                                                                                                                                                                                                                                                                                                                                                                                                                                                                                                                                                                                                                                                                                                                                                                                                                                                                                                                                                                                                                                                                                                                                                                                                                                                                                                                                                                                                                                                                                                                                                                                                                                                                                                                                                                                                                                                                                                                                                                                                                                                                                                                                                                                                                                                                                                                                                                                                                                                                                                                                                                                                                                                                                                                                                                                                                                                                                                                                                                                                                                                                                                                                                                                                                                                                                                                                                                                                                                                                                                                                                                                                                                                                                                                                                                                                                                                                                                                                                                                                                                                                                                                                                                                                                                                                                                                                                                                                                                                                                                                                                                                                   |
|-----------|-----------------|----------------------------------------------------------------------------------------------------------------------------------------------------------------------------------------------------------------------------------------------------------------------------------------------------------------------------------------------------------------------------------------------------------------------------------------------------------------------------------------------------------------------------------------------------------------------------------------------------------------------------------------------------------------------------------------------------------------------------------------------------------------------------------------------------------------------------------------------------------------------------------------------------------------------------------------------------------------------------------------------------------------------------------------------------------------------------------------------------------------------------------------------------------------------------------------------------------------------------------------------------------------------------------------------------------------------------------------------------------------------------------------------------------------------------------------------------------------------------------------------------------------------------------------------------------------------------------------------------------------------------------------------------------------------------------------------------------------------------------------------------------------------------------------------------------------------------------------------------------------------------------------------------------------------------------------------------------------------------------------------------------------------------------------------------------------------------------------------------------------------------------------------------------------------------------------------------------------------------------------------------------------------------------------------------------------------------------------------------------------------------------------------------------------------------------------------------------------------------------------------------------------------------------------------------------------------------------------------------------------------------------------------------------------------------------------------------------------------------------------------------------------------------------------------------------------------------------------------------------------------------------------------------------------------------------------------------------------------------------------------------------------------------------------------------------------------------------------------------------------------------------------------------------------------------------------------------------------------------------------------------------------------------------------------------------------------------------------------------------------------------------------------------------------------------------------------------------------------------------------------------------------------------------------------------------------------------------------------------------------------------------------------------------------------------------------------------------------------------------------------------------------------------------------------------------------------------------------------------------------------------------------------------------------------------------------------------------------------------------------------------------------------------------------------------------------------------------------------------------------------------------------------------------------------------------------------------------------------------------------------------------------------------------------------------------------------------------------------------------------------------------------------------------------------------------------------------------------------------------------------------------------------------------------------------------------------------------------------------------------------------------------------------------------------------------------------------------------------------------------------------------------------------------------------------------------------------------------------------------------------------------------------------------------------------------------------------------------------------------------------------------------------------------------------------------------------------------------------------------------------------------------------------------------------------------------------------------------------------------------------------------------------------------------------------------------------------------------------------------------------------------------------------------------------------------------------------------------------------------------------------------------------------------------------------------------------------------------------------------------------------------------------------------------------------------------------------------------------------------------------------------------------------------------------------------------------------------------------------------------------------------------------------------------------------------------------------------------------------------------------------------------------------------------------------------------------------------------------------------------------------------------------------------------------------------------------------------------------------------------------------------------------------------------------------------------------------------------------------------------------------------------------------------------------------------------------------------------------------------------------------------------------------------------------------------------------------------------------------------------------------------------------------------------------------------------------------------------------------------------------------------------------------------------------------------------------------------------------------------------------------------------------------------------------------------------------------------------------------------------------------------------------------------------------------------------------------------------------------------------------------------------------------------------------------------------------------------------------------------------------------------------------------------------------------------------------------------------------------------------------------------------------------------------------------------------------------------------------------------------------------------------------------------------------------------------------------------------------------------------------------------------------------------------------------------------------------------------------------------------------------------------------------------------------------------------------------------------------------------------------------------------------------------------------------------------------------------------------------------------------------------------------------------------------------------------------------------------------------------------------------------------------------------------------------------------------------------------------------------------------------------------------------------------------------------------------------------------------------------------------------------------------------------------------------------------------------------------------------------------------------------------------------------------------------------------------------------------------------------------------------------------------------------------------------------------------------------------------------------------------------------------------------------------------------------------------------------------------------------------------------------------------------------------------------------------------------------------------------------------------------------------------------------------------------------------------------------------------------------------------------------------------------------------------------------------------------------------------------------------------------------------------------------------------------------------------------------------------------------------------------------------------------------------------------------------------------------------------------------------------------------------------------------------------------------------------------------------------------------------------------------------------------------------------------------------------------------------------------------------------------------------------------------------------------------------------------------------------------------------------------------------------------------------------------------------------------------------------------------------------------------------------------------------------------------------------------------------------------------------------------------------------------------------------------------------------------------------------------------------------------------------------------------------------------------------------------------------------------------------------------------------------------------------------------------------------------------------------------------------------------------------------------------------------------------------------------------------------------------------------------------------------------------------------------------------------------------------------------------------------------------------------------------------------------------------------------------------------------------------------------------------------------------------------------------------------------------------------------------------------------------------------------------------------------------------------------------------------------------------------------------------------------------------------------------------------------------------------------------|
| Fractures | Diagnosis codes | ICD-9: 733.10, 733.11, 733.12, 733.13, 733.16, 733.19, 733.82, 733.93, 733.94, 733.95, 733.96, 733.97, 733.98, 767.3, 800.0, 800.1, 800.2, 800.3, 800.4, 800.5, 800.6, 800.7, 800.8, 800.9, 801.0, 801.1, 801.2, 801.3, 801.4, 801.5, 801.6, 801.7, 801.8, 801.9, 802.0, 802.1, 802.20, 802.21, 802.22, 802.23, 802.24, 802.25, 802.26, 802.27, 802.28, 802.29, 802.30, 802.31, 802.32, 802.33, 802.34, 802.35, 802.36, 802.37, 802.38, 802.39, 802.4, 802.5, 802.6, 802.7, 802.8, 802.9, 803.0, 803.1, 803.2, 803.3, 803.4, 803.5, 803.6, 803.7, 803.8, 803.9, 804.1, 804.2, 804.3, 804.4, 804.5, 804.6, 804.7, 804.8, 804.9, 805.00, 805.01, 805.02, 805.03, 805.04, 805.05, 805.06, 805.07, 805.08, 805.10, 805.11, 805.12, 805.13, 805.14, 805.15, 805.16, 805.17, 805.18, 805.2, 805.3, 805.4, 805.5, 805.6, 805.7, 805.8, 805.9, 806.0, 806.1, 806.2, 806.3, 806.4, 806.5, 806.6, 806.61, 806.62, 806.69, 806.70, 806.71, 806.72, 806.79, 806.8, 806.9, 807.0, 807.1, 807.2, 807.3, 807.4, 807.5, 807.6, 808.0, 808.1, 808.2, 808.3, 808.41, 808.42, 808.43, 808.44, 808.49, 808.51, 808.52, 808.53, 808.54, 808.59, 808.8, 808.9, 809.0, 809.1, 810.00, 810.01, 810.02, 810.03, 810.11, 810.12, 810.13, 811.00, 811.01, 811.02, 811.03, 811.09, 811.10, 811.11, 811.12, 811.13, 811.19, 812.00, 812.01, 812.02, 812.03, 812.09, 812.10, 812.11, 812.12, 812.13, 812.19, 812.20, 812.21, 812.30, 812.31, 812.40, 812.41, 812.42, 812.43, 812.44, 812.49, 812.50, 812.51, 812.52, 812.53, 812.54, 812.59, 813.00, 813.01, 813.02, 813.03, 813.04, 813.05, 813.06, 813.07, 813.08, 813.10, 813.11, 813.12, 813.13, 813.14, 813.15, 813.16, 813.17, 813.18, 813.20, 813.21, 813.22, 813.23, 813.30, 813.31, 813.32, 813.33, 813.40, 813.41, 813.42, 813.43, 813.44, 813.45, 813.46, 813.47, 813.50, 813.51, 813.52, 813.53, 813.54, 813.80, 813.81, 813.82, 813.83, 813.90, 813.91, 813.92, 813.93, 814.00, 814.01, 814.02, 814.03, 814.04, 814.05, 814.06, 814.07, 814.08, 814.09, 814.10, 814.11, 814.12, 814.13, 814.14, 814.15, 814.16, 814.17, 814.18, 814.19, 815.00, 815.01, 815.02, 815.03, 815.04, 815.09, 815.10, 815.11, 815.12, 815.13, 815.14, 815.19, 816.00, 816.01, 816.02, 816.03, 816.10, 816.11, 816.12, 816.13, 817.0, 817.1, 818.0, 818.1, 819.0, 819.1, 820.00, 820.01, 820.02, 820.03, 820.09, 820.10, 820.11, 820.12, 820.13, 820.19, 820.20, 820.21, 820.22, 820.3, 820.31, 820.32, 820.8, 820.9, 821.00, 821.01, 821.10, 821.11, 821.20, 821.21, 821.22, 821.23, 821.29, 821.30, 821.31, 821.32, 821.33, 821.39, 822.0, 822.1, 823.00, 823.01, 823.02, 823.10, 823.11, 823.12, 823.20, 823.21, 823.22, 823.30, 823.31, 823.32, 823.40, 823.41, 823.42, 823.8, 823.81, 823.82, 823.90, 823.91, 823.92, 824.0, 824.1, 824.2, 824.3, 824.4, 824.5, 824.6, 824.7, 824.8, 824.9, 825.0, 825.1, 825.20, 825.21, 825.22, 825.23, 825.24, 825.25, 825.29, 825.30, 825.31, 825.32, 825.33, 825.34, 825.35, 825.39, 826.0, 826.1, 827.0, 827.1, 828.0, 828.1, 829.0, 829.1, 873.63, 873.73, 959.13                                                                                                                                                                                                                                                                                                                                                                                                                                                                                                                                                                                                                                                                                                                                                                                                                                                                                                                                                                                                                                                                                                                                                                                                                                                                                                                                                                                                                                                                                                                                                                                                                                                                                                                                                                                                                                                                                                                                                                                                                                                                                                                                                                                                                                                                                                                                                                                                                                                                                                                                                                                                                                                                                                                                                                                                                                                                                                                                                                                                                                                                                                                                                                                                                                                                                                                                                                                                                                                                                                                                                                                                                                                                                                                                                                                                                                                                                                                                                                                                                                                                                                                                                                                                                                                                                                                                                                                                                                                                                                                                                                                                                                                                                                                                                                                                                                                                                                                                                                                                                                                                                                                                                                                                                                                                                                                                                                                                                                                                                                                                                                                                                                                                                                                                                                                                                                                                                                                                                                                                                                                                                                                                                                                                                                                                                                                                                                                                                                                                                                                                                                                                                                                                                                                                                                                                                                                                                                                                                                                                                                                                                                                                                                                                                                                                                                                                                                                                                                                                                                                                                                                                                                                                                                                                                                                                                                                                                                                                                                                                                                                                                                                                                                                                            |
|           |                 | ICD-10: M48.40xA, M48.41xA, M48.42xA, M48.43xA, M48.44xA, M48.45xA, M48.46xA, M48.47xA, M48.48xA, M48.50xA, M80.08xA, M84.30xA, M84.31A, M84.32A, M84.33A, M84.34A, M84.35A, M84.35A, M84.36A, M84.37A, M84.37A, M84.37A, M84.37A, M84.38xA, M84.40xA, M84.41A, M84.42A, M84.43A, M84.46A, M84.47A, M84.48xA, M84.68xA, P13.0, P13.2, P13.3, P13.8, S02.2xxA, S02.2xxB, S02.30xA, S02.30xB, S02.31xA, S02.31xB, S02.32xA, S02.32xB, S02.400A, S02.400B, S02.401A, S02.401B, S02.402A, S02.402B, S02.40A, S02.40AB, S02.40BA, S02.40BB, S02.40CA, S02.40CB, S02.40DA, S02.40DB, S02.40EA, S02.40EB, S02.40FA, S02.40FB, S02.42xA, S02.42xB, S02.5xxA, S02.5xxB, S02.600A, S02.600B, S02.601A, S02.601B, S02.602A, S02.602B, S02.609A, S02.609B, S02.610A, S02.610B, S02.611A, S02.611B, S02.612A, S02.612B, S02.620A, S02.620B, S02.621A, S02.621B, S02.622A, S02.622B, S02.630A, S02.630B, S02.631A, S02.631B, S02.632A, S02.632B, S02.640A, S02.640B, S02.641A, S02.641B, S02.642A, S02.642B, S02.650A, S02.650B, S02.651A, S02.651B, S02.652A, S02.652B, S02.66xA, S02.66xB, S02.670A, S02.670B, S02.671A, S02.671B, S02.672A, S02.672B, S02.69xA, S02.69xB, S02.91xK, S02.92xA, S02.92xB, S02.92xK, S12.000A, S12.000B, S12.001A, S12.001B, S12.001K, S12.100A, S12.100B, S12.100K, S12.101A, S12.101B, S12.101K, S12.200A, S12.200B, S12.200K, S12.201A, S12.201B, S12.201K, S12.300A, S12.300B, S12.300K, S12.301A, S12.301B, S12.301K, S12.400A, S12.400B, S12.400K, S12.401A, S12.401B, S12.401K, S12.500A, S12.500B, S12.500K, S12.501A, S12.501B, S12.501K, S12.600A, S12.600B, S12.600K, S12.601A, S12.601B, S12.601K, S12.8xxA, S12.9xxA, S14.109A, S22.009A, S22.009B, S22.20xA, S22.20xB, S22.49xA, S22.49xB, S22.5xxA, S22.5xxB, S22.9xxA, S22.9xxB, S22.9xxK, S24.109A, S32.009A, S32.009B, S32.019A, S32.019B, S32.029A, S32.029B, S32.039A, S32.039B, S32.049A, S32.049B, S32.059A, S32.059B, S32.10xA, S32.10xB, S32.2xxA, S32.2xxB, S32.309A, S32.309B, S32.409A, S32.409B, S32.501A, S32.501B, S32.502A, S32.502B, S32.509A, S32.509B, S32.609A, S32.609B, S32.810A, S32.810B, S32.811A, S32.811B, S32.82xA, S32.82xB, S32.89xA, S32.89xB, S32.9xxA, S32.9xxB, S34.101A, S34.102A, S34.103A, S34.104A, S34.105A, S34.109A, S34.111A, S34.112A, S34.113A, S34.114A, S34.115A, S34.119A, S34.121A, S34.122A, S34.123A, S34.124A, S34.125A, S34.129A, S34.131A, S34.132A, S34.139A, S34.3xxA, S39.840A, S42.009A, S42.009K, S42.013A, S42.013B, S42.016A, S42.016B, S42.019A, S42.019B, S42.023A, S42.023B, S42.026A, S42.026B, S42.033A, S42.033B, S42.036A, S42.036B, S42.109A, S42.109B, S42.113A, S42.113B, S42.116A, S42.116B, S42.123A, S42.123B, S42.126A, S42.126B, S42.133A, S42.133B, S42.136A, S42.136B, S42.143A, S42.143B, S42.146A, S42.146B, S42.153A, S42.153B, S42.156A, S42.156B, S42.199A, S42.199B, S42.209A, S42.209B, S42.209K, S42.213A, S42.213B, S42.216A, S42.216B, S42.253A, S42.253B, S42.256A, S42.256B, S42.293A, S42.293B, S42.295A, S42.296A, S42.296B, S42.309A, S42.309B, S42.399A, S42.399B, S42.409A, S42.409B, S42.413A, S42.413B, S42.416A, S42.416B, S42.433A, S42.436A, S42.443A, S42.446A, S42.453A, S42.453B, S42.456A, 42.456B, S42.463A, S42.463B, S42.466A, S42.466B, S42.473A, S42.473B, S42.476A, S42.476B, S42.493A, S42.493B, S42.496A, S42.496B, S42.90xA, S42.90xB, S42.90xA, S42.91xA, S42.91xB, S42.92xA, S42.92xB, S52.009A, S52.009B, S52.009C, S52.011A, S52.012A, S52.019A, S52.023A, S52.023B, S52.023C, S52.026A, S52.026B, S52.026C, S52.043A, S52.043B, S52.043C, S52.046A, S52.046B, S52.046C, S52.099A, S52.099B, S52.099C, S52.109A, S52.109B, S52.109C, S52.111A, S52.112A, S52.119A, S52.123A, S52.123B, S52.123C, S52.126A, S52.126B, S52.126C, S52.133A, S52.133B, S52.133C, S52.136A, S52.136B, S52.136C, S52.189A, S52.189B, S52.189C, S52.209A, S52.209B, S52.209C, S52.279A, S52.279B, S52.279C, S52.309A, S52.309B, S52.309C, S52.509A, S52.509B, S52.509C, S52.521A, S52.522A, S52.529A, S52.539A, S52.539B, S52.539C, S52.549A, S52.609A, S52.609B, S52.609C, S52.621A, S52.622A, S52.629A, S52.90xA, S52.90xB, S52.90xC, S52.90xK, S52.90xM, S52.90xN, S52.91xA, S52.91xB, S52.92xA, S52.92xB, S59.109A, S62.009A, S62.009B, S62.109A, S62.109B, S62.113A, S62.113B, S62.116A, S62.116B, S62.123A, S62.123B, S62.126A, S62.126B, S62.133A, S62.133B, S62.136A, S62.136B, S62.143A, S62.143B, S62.146A, S62.146B, S62.153A, S62.153B, S62.156A, S62.156B, S62.163A, S62.163B, S62.166A, S62.166B, S62.173A, S62.173B, S62.176A, S62.176B, S62.183A, S62.183B, S62.186A, S62.186B, S62.233A, S62.233B, S62.236A, S62.236B, S62.309A, S62.309B, S62.319A, S62.319B, S62.329A, S62.329B, S62.339A, S62.339B, S62.349A, S62.349B, S62.359A, S62.359B, S62.369A, S62.369B, S62.399A, S62.399B, S62.509A, S62.509B, S62.513A, S62.513B, S62.516A, S62.516B, S62.523A, S62.523B, S62.526A, S62.526B, S62.609A, S62.609B, S62.609C, S62.629A, S62.629B, S62.639A, S62.639B, S62.649A, S62.649B, S62.659A, S62.659B, S62.669A, S62.669B, S62.90xA, S62.90xB, S62.90xK, S62.909A, S62.909B, S62.909C, S62.919A, S62.919B, S62.919C, S62.919D, S62.919E, S62.919F, S62.919G, S62.919H, S62.919I, S62.919J, S62.919K, S62.919L, S62.919M, S62.919N, S62.919O, S62.919P, S62.919Q, S62.919R, S62.919S, S62.919T, S62.919U, S62.919V, S62.919W, S62.919X, S62.919Y, S62.919Z, S62.919AA, S62.919AB, S62.919AC, S62.919AD, S62.919AE, S62.919AF, S62.919AG, S62.919AH, S62.919AI, S62.919AJ, S62.919AK, S62.919AL, S62.919AM, S62.919AN, S62.919AO, S62.919AP, S62.919AQ, S62.919AR, S62.919AS, S62.919AT, S62.919AU, S62.919AV, S62.919AW, S62.919AX, S62.919AY, S62.919AZ, S62.919BA, S62.919BB, S62.919BC, S62.919BD, S62.919BE, S62.919BF, S62.919BG, S62.919BH, S62.919BI, S62.919BJ, S62.919BK, S62.919BL, S62.919BM, S62.919BN, S62.919BO, S62.919BP, S62.919BQ, S62.919BR, S62.919BS, S62.919BT, S62.919BU, S62.919BV, S62.919BW, S62.919BX, S62.919BY, S62.919BZ, S62.919CA, S62.919CB, S62.919CC, S62.919CD, S62.919CE, S62.919CF, S62.919CG, S62.919CH, S62.919CI, S62.919CJ, S62.919CK, S62.919CL, S62.919CM, S62.919CN, S62.919CO, S62.919CP, S62.919CQ, S62.919CR, S62.919CS, S62.919CT, S62.919CU, S62.919CV, S62.919CW, S62.919CX, S62.919CY, S62.919CZ, S62.919DA, S62.919DB, S62.919DC, S62.919DD, S62.919DE, S62.919DF, S62.919DG, S62.919DH, S62.919DI, S62.919DJ, S62.919DK, S62.919DL, S62.919DM, S62.919DN, S62.919DO, S62.919DP, S62.919DQ, S62.919DR, S62.919DS, S62.919DT, S62.919DU, S62.919DV, S62.919DW, S62.919DX, S62.919DY, S62.919DZ, S62.919EA, S62.919EB, S62.919EC, S62.919ED, S62.919EE, S62.919EF, S62.919EG, S62.919EH, S62.919EI, S62.919EJ, S62.919EK, S62.919EL, S62.919EM, S62.919EN, S62.919EO, S62.919EP, S62.919EQ, S62.919ER, S62.919ES, S62.919ET, S62.919EU, S62.919EV, S62.919EW, S62.919EX, S62.919EY, S62.919EZ, S62.919FA, S62.919FB, S62.919FC, S62.919FD, S62.919FE, S62.919FF, S62.919FG, S62.919FH, S62.919FI, S62.919FJ, S62.919FK, S62.919FL, S62.919FM, S62.919FN, S62.919FO, S62.919FP, S62.919FQ, S62.919FR, S62.919FS, S62.919FT, S62.919FU, S62.919FV, S62.919FW, S62.919FX, S62.919FY, S62.919FZ, S62.919GA, S62.919GB, S62.919GC, S62.919GD, S62.919GE, S62.919GF, S62.919GG, S62.919GH, S62.919GI, S62.919GJ, S62.919GK, S62.919GL, S62.919GM, S62.919GN, S62.919GO, S62.919GP, S62.919GQ, S62.919GR, S62.919GS, S62.919GT, S62.919GU, S62.919GV, S62.919GW, S62.919GX, S62.919GY, S62.919GZ, S62.919HA, S62.919HB, S62.919HC, S62.919HD, S62.919HE, S62.919HF, S62.919HG, S62.919HH, S62.919HI, S62.919HJ, S62.919HK, S62.919HL, S62.919HM, S62.919HN, S62.919HO, S62.919HP, S62.919HQ, S62.919HR, S62.919HS, S62.919HT, S62.919HU, S62.919HV, S62.919HW, S62.919HX, S62.919HY, S62.919HZ, S62.919IA, S62.919IB, S62.919IC, S62.919ID, S62.919IE, S62.919IF, S62.919IG, S62.919IH, S62.919II, S62.919IJ, S62.919IK, S62.919IL, S62.919IM, S62.919IN, S62.919IO, S62.919IP, S62.919IQ, S62.919IR, S62.919IS, S62.919IT, S62.919IU, S62.919IV, S62.919IW, S62.919IX, S62.919IY, S62.919IZ, S62.919JA, S62.919JB, S62.919JC, S62.919JD, S62.919JE, S62.919JF, S62.919JG, S62.919JH, S62.919JI, S62.919JJ, S62.919JK, S62.919JL, S62.919JM, S62.919JN, S62.919JO, S62.919JP, S62.919JQ, S62.919JR, S62.919JS, S62.919JT, S62.919JU, S62.919JV, S62.919JW, S62.919JX, S62.919JY, S62.919JZ, S62.919KA, S62.919KB, S62.919KC, S62.919KD, S62.919KE, S62.919KF, S62.919KG, S62.919KH, S62.919KI, S62.919KJ, S62.919KK, S62.919KL, S62.919KM, S62.919KN, S62.919KO, S62.919KP, S62.919KQ, S62.919KR, S62.919KS, S62.919KT, S62.919KU, S62.919KV, S62.919KW, S62.919KX, S62.919KY, S62.919KZ, S62.919LA, S62.919LB, S62.919LC, S62.919LD, S62.919LE, S62.919LF, S62.919LG, S62.919LH, S62.919LI, S62.919LJ, S62.919LK, S62.919LL, S62.919LM, S62.919LN, S62.919LO, S62.919LP, S62.919LQ, S62.919LR, S62.919LS, S62.919LT, S62.919LU, S62.919LV, S62.919LW, S62.919LX, S62.919LY, S62.919LZ, S62.919MA, S62.919MB, S62.919MC, S62.919MD, S62.919ME, S62.919MF, S62.919MG, S62.919MH, S62.919MI, S62.919MJ, S62.919MK, S62.919ML, S62.919MM, S62.919MN, S62.919MO, S62.919MP, S62.919MQ, S62.919MR, S62.919MS, S62.919MT, S62.919MU, S62.919MV, S62.919MW, S62.919MX, S62.919MY, S62.919MZ, S62.919NA, S62.919NB, S62.919NC, S62.919ND, S62.919NE, S62.919NF, S62.919NG, S62.919NH, S62.919NI, S62.919NJ, S62.919NK, S62.919NL, S62.919NM, S62.919NN, S62.919NO, S62.919NP, S62.919NQ, S62.919NR, S62.919NS, S62.919NT, S62.919NU, S62.919NV, S62.919NW, S62.919NX, S62.919NY, S62.919NZ, S62.919OA, S62.919OB, S62.919OC, S62.919OD, S62.919OE, S62.919OF, S62.919OG, S62.919OH, S62.919OI, S62.919OJ, S62.919OK, S62.919OL, S62.919OM, S62.919ON, S62.919OO, S62.919OP, S62.919OQ, S62.919OR, S62.919OS, S62.919OT, S62.919OU, S62.919OV, S62.919OW, S62.919OX, S62.919OY, S62.919OZ, S62.919PA, S62.919PB, S62.919PC, S62.919PD, S62.919PE, S62.919PF, S62.919PG, S62.919PH, S62.919PI, S62.919PJ, S62.919PK, S62.919PL, S62.919PM, S62.919PN, S62.919PO, S62.919PP, S62.919PQ, S62.919PR, S62.919PS, S62.919PT, S62.919PU, S62.919PV, S62.919PW, S62.919PX, S62.919PY, S62.919PZ, S62.919QA, S62.919QB, S62.919QC, S62.919QD, S62.919QE, S62.919QF, S62.919QG, S62.919QH, S62.919QI, S62.919QJ, S62.919QK, S62.919QL, S62.919QM, S62.919QN, S62.919QO, S62.919QP, S62.919QQ, S62.919QR, S62.919QS, S62.919QT, S62.919QU, S62.919QV, S62.919QW, S62.919QX, S62.919QY, S62.919QZ, S62.919RA, S62.919RB, S62.919RC, S62.919RD, S62.919RE, S62.919RF, S62.919RG, S62.919RH, S62.919RI, S62.919RJ, S62.919RK, S62.919RL, S62.919RM, S62.919RN, S62.919RO, S62.919RP, S62.919RQ, S62.919RR, S62.919RS, S62.919RT, S62.919RU, S62.919RV, S62.919RW, S62.919RX, S62.919RY, S62.919RZ, S62.919SA, S62.919SB, S62.919SC, S62.919SD, S62.919SE, S62.919SF, S62.919SG, S62.919SH, S62.919SI, S62.919SJ, S62.919SK, S62.919SL, S62.919SM, S62.919SN, S62.919SO, S62.919SP, S62.919SQ, S62.919SR, S62.919SS, S62.919ST, S62.919SU, S62.919SV, S62.919SW, S62.919SX, S62.919SY, S62.919SZ, S62.919TA, S62.919TB, S62.919TC, S62.919TD, S62.919TE, S62.919TF, S62.919TG, S62.919TH, S62.919TI, S62.919TJ, S62.919TK, S62.919TL, S62.919TM, S62.919TN, S62.919TO, S62.919TP, S62.919TQ, S62.919TR, S62. |

**Supplemental Table S2.** Event frequencies among those exposed or not exposed to steroids.

|                            | Included in analysis        |                       | Excluded from analysis                                          |                                                   |                                                     | Total number of patients contributing to analysis |
|----------------------------|-----------------------------|-----------------------|-----------------------------------------------------------------|---------------------------------------------------|-----------------------------------------------------|---------------------------------------------------|
|                            | Never had SAAE<br>n (row %) | Had SAAE<br>n (row %) | Excluded: SAAE<br>prior to kidney<br>disease onset<br>n (row %) | Excluded:<br>missing date of<br>SAAE<br>n (row %) | Excluded: other<br>reason <sup>1</sup><br>n (row %) |                                                   |
| Any SAAE                   |                             |                       |                                                                 |                                                   |                                                     |                                                   |
| Single-occurrence events   | 375 (42.4)                  | 509 (57.6)            | 0 (0)                                                           | 0 (0)                                             | 0 (0)                                               | 884                                               |
| Hypertension               | 220 (24.9)                  | 448 (50.7)            | 135 (15.3)                                                      | 24 (2.7)                                          | 57 (6.5)                                            | 668                                               |
| Hyperglycemia              | 756 (85.5)                  | 60 (6.8)              | 63 (7.1)                                                        | 5 (0.6)                                           | 0 (0)                                               | 816                                               |
| Diabetes                   | 604 (68.3)                  | 224 (25.3)            | 50 (5.7)                                                        | 6 (0.7)                                           | 0 (0)                                               | 828                                               |
| Overweight                 | 573 (64.8)                  | 199 (22.5)            | 112 (12.7)                                                      | 0 (0)                                             | 0 (0)                                               | 772                                               |
| Obese                      | 571 (64.6)                  | 244 (27.6)            | 63 (7.1)                                                        | 6 (0.7)                                           | 0 (0)                                               | 815                                               |
| Short Stature              | 315 (35.6)                  | 59 (6.7)              | 19 (2.2)                                                        | 0 (0)                                             | 491 (55.5)                                          | 374                                               |
| Cataracts                  | 856 (96.8)                  | 18 (2.0)              | 6 (0.6)                                                         | 4 (0.5)                                           | 0 (0)                                               | 874                                               |
| Glaucoma                   | 878 (99.3)                  | 6 (0.7)               | 0 (0)                                                           | 0 (0)                                             | 0 (0)                                               | 884                                               |
| Osteoporosis               | 871 (98.5)                  | 9 (1.0)               | 0 (0)                                                           | 4 (0.5)                                           | 0 (0)                                               | 880                                               |
| Osteonecrosis              | 881 (99.7)                  | 3 (0.3)               | 0 (0)                                                           | 0 (0)                                             | 0 (0)                                               | 884                                               |
| Psychosis                  | 880 (99.6)                  | 3 (0.3)               | 1 (0.1)                                                         | 0 (0)                                             | 0 (0)                                               | 883                                               |
| Multiple-occurrence events |                             |                       |                                                                 |                                                   |                                                     |                                                   |
| Fractures                  | 860 (97.3)                  | 24 (2.7)              | 0 (0)                                                           | 0 (0)                                             | 0 (0)                                               | 884                                               |
| Any Infection              | 797 (90.2)                  | 87 (9.8)              | 0 (0)                                                           | 0 (0)                                             | 0 (0)                                               | 884                                               |
| Pneumonia                  | 831 (94.0)                  | 53 (6.0)              | 0 (0)                                                           | 0 (0)                                             | 0 (0)                                               | 884                                               |
| Septicemia/bacteremia      | 865 (97.9)                  | 19 (2.1)              | 0 (0)                                                           | 0 (0)                                             | 0 (0)                                               | 884                                               |
| Peritonitis                | 872 (98.6)                  | 12 (1.4)              | 0 (0)                                                           | 0 (0)                                             | 0 (0)                                               | 884                                               |
| Cellulitis                 | 854 (96.6)                  | 30 (3.4)              | 0 (0)                                                           | 0 (0)                                             | 0 (0)                                               | 884                                               |

<sup>1</sup> For the hypertension analysis, patients with a diagnosis of “white coat” hypertension were excluded; for the short stature analysis, patients with adult-onset kidney disease were excluded  
Abbreviations: SAAE=steroid-associated adverse event

**Supplemental Table S3.** Person-time comparison of risk of experiencing selected adverse events: comparisons by age and diagnosis limited to those treated with steroids

|                               | Unadjusted Relative Risk <sup>1</sup> (95% CI)<br>Children vs. Adults | p-value | Unadjusted Relative Risk <sup>2</sup> (95% CI)<br>FSGS/MCD vs. MN | p-value |
|-------------------------------|-----------------------------------------------------------------------|---------|-------------------------------------------------------------------|---------|
| Any SAAEs (n=535)             | 0.9 [0.8 to 1.1]                                                      | 0.429   | 1.0 [0.8 to 1.4]                                                  | 0.920   |
| Single-occurrence events      |                                                                       |         |                                                                   |         |
| Hypertension (n=337)          | 0.8 [0.6 to 1.2]                                                      | 0.360   | 0.6 [0.3 to 1.0]                                                  | 0.057   |
| Hyperglycemia (n=535)         | 0.6 [0.3 to 1.0]                                                      | 0.062   | 0.7 [0.3 to 1.6]                                                  | 0.410   |
| Diabetes (n=493)              | 0.7 [0.5 to 1.0]                                                      | 0.053   | 1.2 [0.7 to 2.1]                                                  | 0.535   |
| Overweight (n=493)            | 0.8 [0.5 to 1.2]                                                      | 0.239   | 1.0 [0.5 to 2.1]                                                  | 0.980   |
| Obese (n=470)                 | 1.0 [0.7 to 1.4]                                                      | 0.843   | 0.6 [0.3 to 1.0]                                                  | 0.042   |
| Short Stature (n=274)         | ---                                                                   | ---     | 1.0 [0.1 to 9.0]                                                  | 0.981   |
| Cataracts (n=535)             | 2.2 [0.6 to 8.1]                                                      | 0.243   | ---                                                               | ---     |
| Glaucoma (n=535)              | ---                                                                   | ---     | ---                                                               | ---     |
| Osteoporosis (n=535)          | 0.3 [0.1 to 1.5]                                                      | 0.141   | 0.4 [0.1 to 2.0]                                                  | 0.254   |
| Osteonecrosis (n=535)         | 0.4 [0.0 to 4.1]                                                      | 0.414   | 0.2 [0.0 to 3.0]                                                  | 0.239   |
| Psychosis (n=535)             | ---                                                                   | ---     | ---                                                               | ---     |
| Multiple-occurrence events    |                                                                       |         |                                                                   |         |
| Fractures (n=535)             | 1.2 [0.5 to 3.1]                                                      | 0.669   | ---                                                               | ---     |
| Any Infection (n=535)         | 1.1 [0.6 to 1.9]                                                      | 0.791   | 1.0 [0.4 to 2.5]                                                  | 0.990   |
| Pneumonia (n=535)             | 1.5 [0.8 to 3.1]                                                      | 0.219   | 0.9 [0.3 to 2.8]                                                  | 0.905   |
| Septicemia/Bacteremia (n=535) | 0.7 [0.2 to 2.1]                                                      | 0.513   | 2.5 [0.3 to 20.4]                                                 | 0.382   |
| Peritonitis (n=535)           | ---                                                                   | ---     | ---                                                               | ---     |
| Cellulitis (n=535)            | 0.6 [0.3 to 1.6]                                                      | 0.339   | 0.6 [0.2 to 2.7]                                                  | 0.532   |

<sup>1</sup>RR estimates are derived from a Poisson GEE model that accounts for the repeated measures of subjects  
Abbreviations: SAAE=steroid-associated adverse event
